# Supplementary material
Source: publisher figshare collection journal article supplement (https://tandf.figshare.com/ndownloader/files/17480630)
Supplement: Supplementary file 1 [file 17480630]

**Preparation and Biological Characterization of Plasma Functionalized Poly(ethylene terephthalate) Antimicrobial Sutures**

Sadiya Anjuma*, Amlan Guptab, Shanti Kumaria, Bhuvanesh Guptaa*

aBioengineering Laboratory, Department of Textile Technology, Indian Institute of Technology, New Delhi-110016, India

bDepartment of Pathology, Sikkim Manipal Institute of Medical Sciences, Sikkim Manipal University, Gangtok-737102, India

__________________________________________________

*Corresponding Authors

Tel.: +91-11-26591416

E-mail: [bgupta@textile.iitd.ernet.in](mailto:bgupta@textile.iitd.ernet.in) (B. Gupta); [sadiya2203@gmail.com](mailto:sadiya2203@gmail.com) (S. Anjum)

**Figure S.1. (a)** EDX spectrum of pristine PET filament and (b) variation of the silver content with the carboxyl content.

**Figure S.2.** Variation of the tensile strength with the plasma exposure time.
